# Supplementary figures and images for: Computational investigation of the binding of a designed peptide to λ light chain amyloid fibril
Source: Royal Society of Chemistry journal article supplement (doi:10.1039/d1cp01825f), 2021-01-01

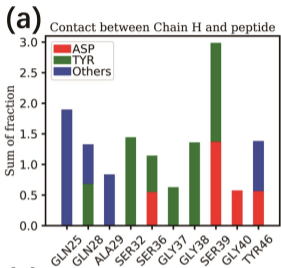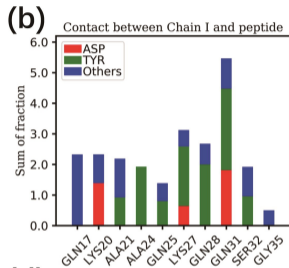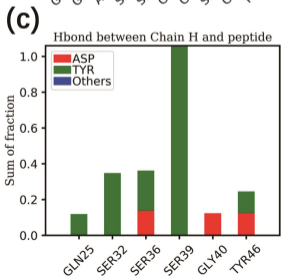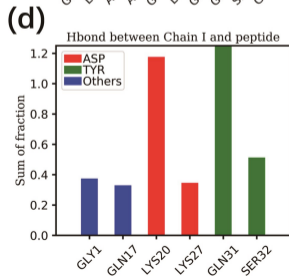

Supplement: d1cp01825f11.pdf [file d1cp01825f11.pdf]

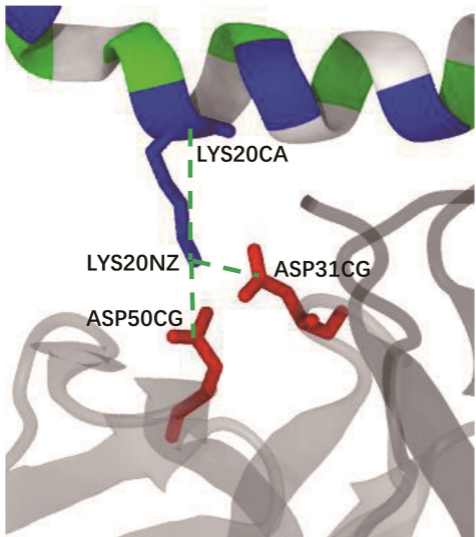

Supplement: d1cp01825f12.pdf [file d1cp01825f12.pdf]

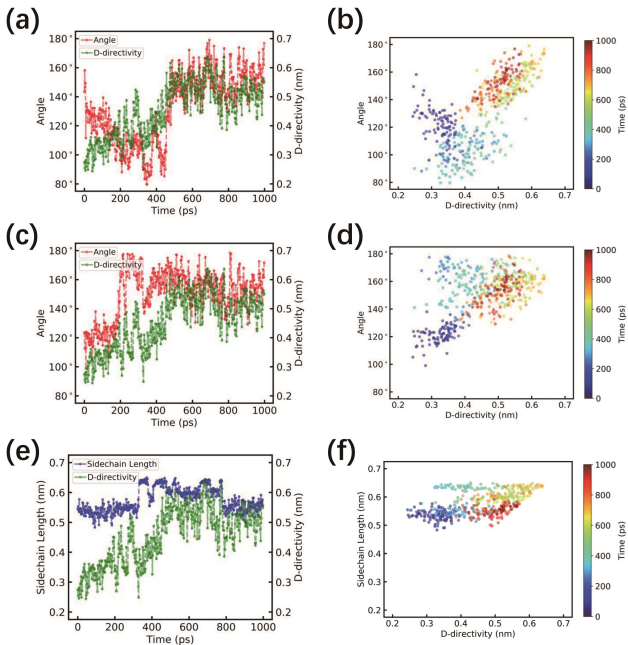

Supplement: d1cp01825f13.pdf [file d1cp01825f13.pdf]

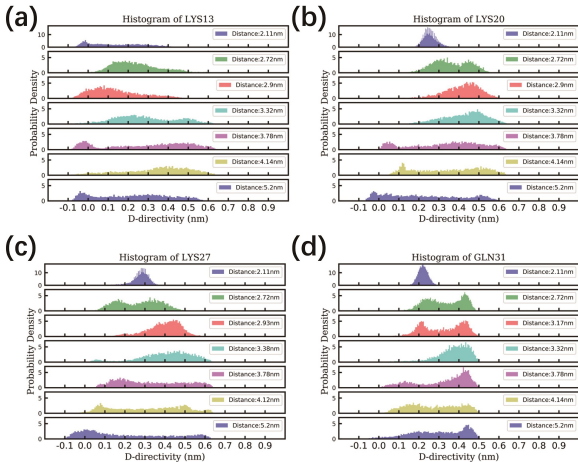

Supplement: d1cp01825f3.pdf [file d1cp01825f3.pdf]

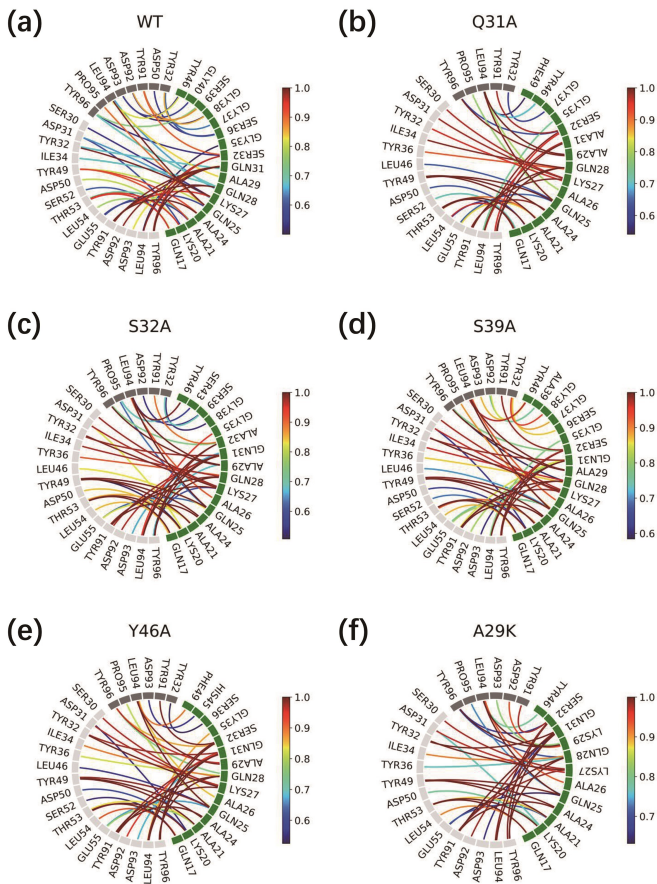

Supplement: d1cp01825f5.pdf [file d1cp01825f5.pdf]

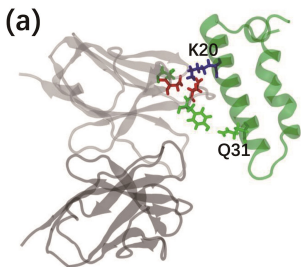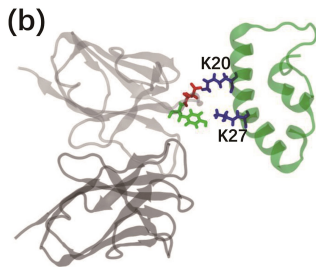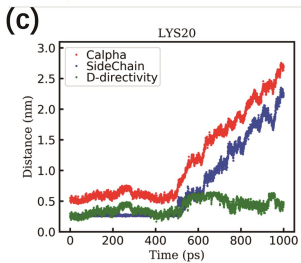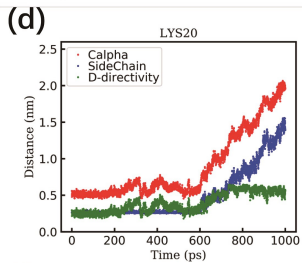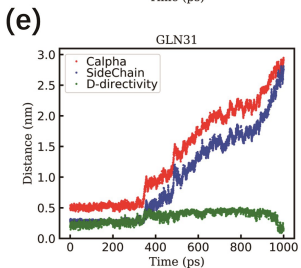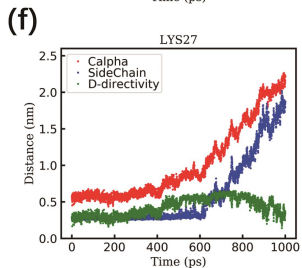

Supplement: d1cp01825f7.pdf [file d1cp01825f7.pdf]
